# Supplementary material
Source: MDPI journal article supplement (https://www.mdpi.com/2079-6412/8/12/435)
Supplement: s1 [file s1]

## Supplementary Materials

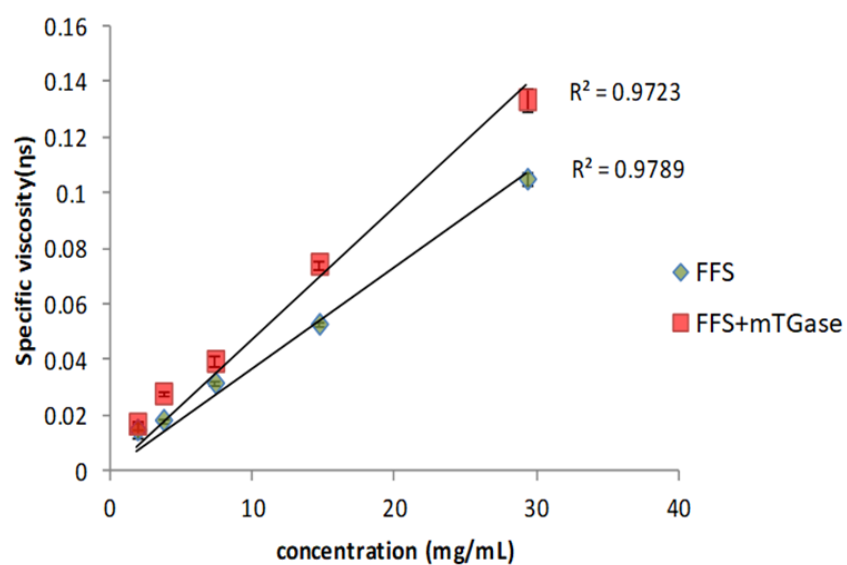

**Figure S1.** Specific viscosity of grass pea flour FFSs prepared in the absence and the presence of mTGase.
